# Supplementary material
Source: PubMed Central journal article supplement (PMC7429742)

## Expanded View Figures

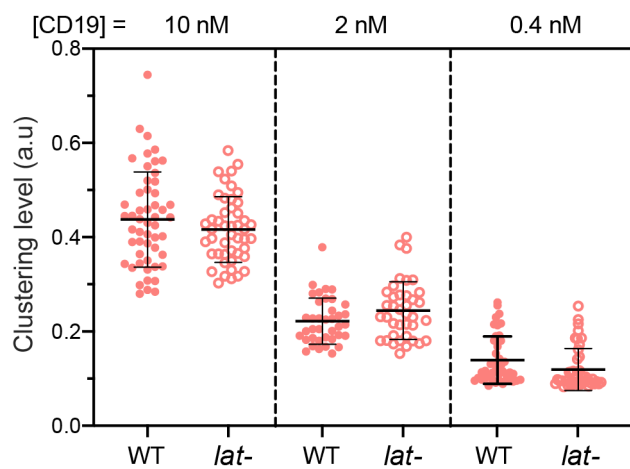

**Figure EV1. Titration analysis of the LAT-independent CAR microcluster formation.**

WT or LAT-deficient (J.LAT) Jurkat T cells expressing CAR-GFP were stimulated on SLB coated with CD19 of indicated concentrations. The clustering of Alexa Fluor 647-labeled streptavidin in conjugation with biotin-CD19 was imaged by TIRF microscopy and quantified as normalized variance in the same way as in Fig 3B. Shown are the means  $\pm$  SD.  $n = 52, 38,$  and  $44$  cells for WT at 10, 2 and 0.4 nM, respectively, and 47, 38, and 44 cells for *lat*<sup>-</sup> cells at 10, 2 and 0.4 nM, respectively.

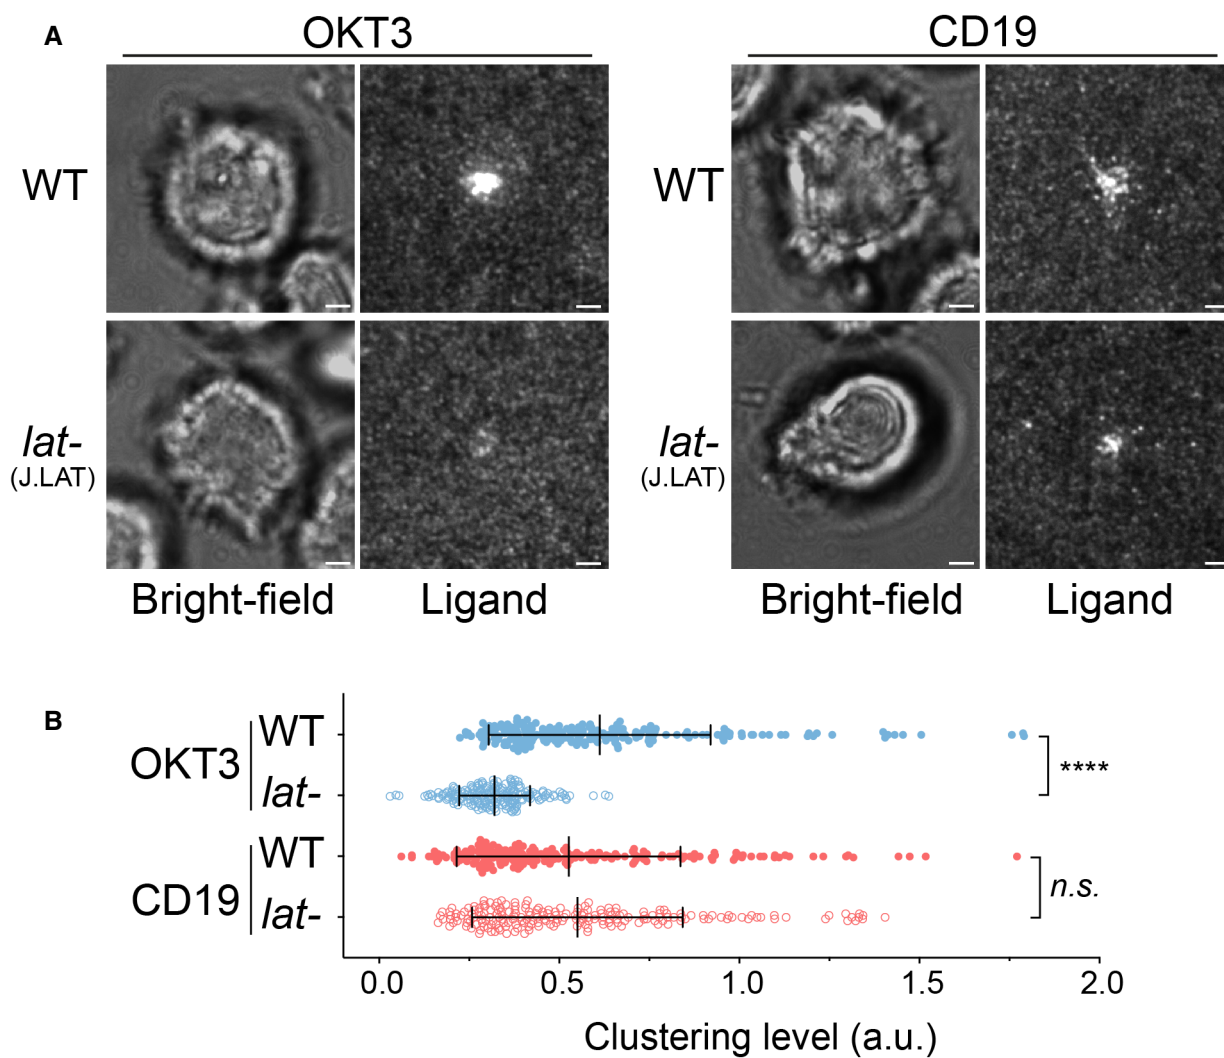

**Figure EV2. LAT-independent CAR microcluster formation in J.LAT cells.**

A WT or LAT-deficient (J.LAT) Jurkat cells expressing CAR were stimulated on supported lipid bilayers coated with OKT3 (anti-TCR antibody) or CD19 (CAR antigen) supplemented with ICAM-1, respectively. TIRF microscopy revealed clustering of Ax647-labeled streptavidin–biotin–OKT3 or CD19, which serves as a probe for TCR or CAR, respectively. Scale bar, 2  $\mu$ m.

B Quantification of clustering as normalized variance.  $n = 200$  cells for each condition. Shown are the mean  $\pm$  SD. Statistical test: unpaired two-tailed  $t$ -test. \*\*\*\* $P < 0.0001$ ,  $n.s.$ ,  $P = 0.4208$ .

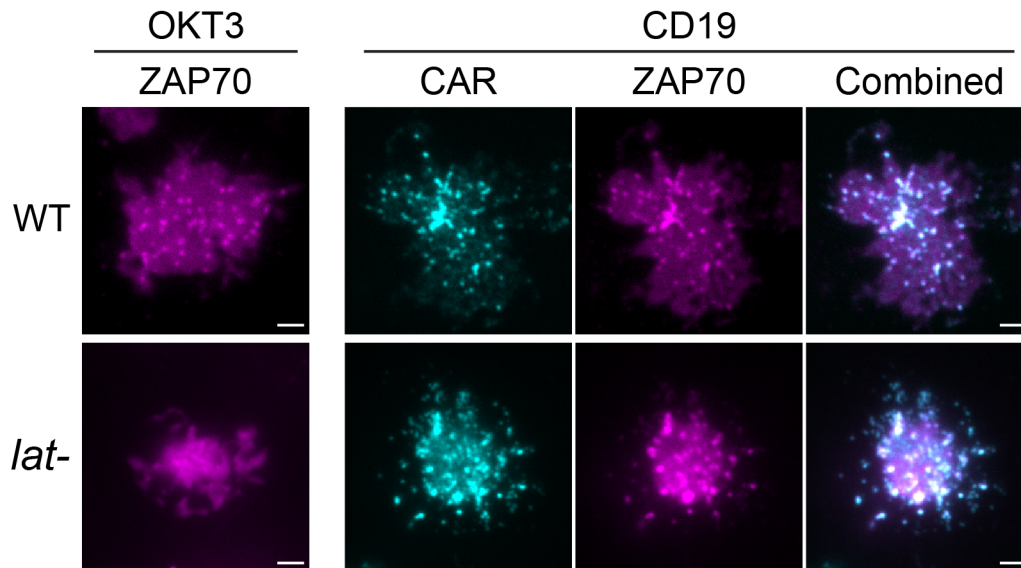

**Figure EV3. ZAP70 is recruited to CAR microclusters in LAT-deficient cells.**

Supported lipid bilayers were coated with OKT3 (left) or CD19 (right) supplemented with ICAM-1. Wild-type or LAT-deficient (*lat*<sup>-2.5</sup>) T cells expressing ZAP70-mCherry and CAR-GFP were plated on the SLB and imaged by TIRF microscopy. Scale bar: 2  $\mu$ m.

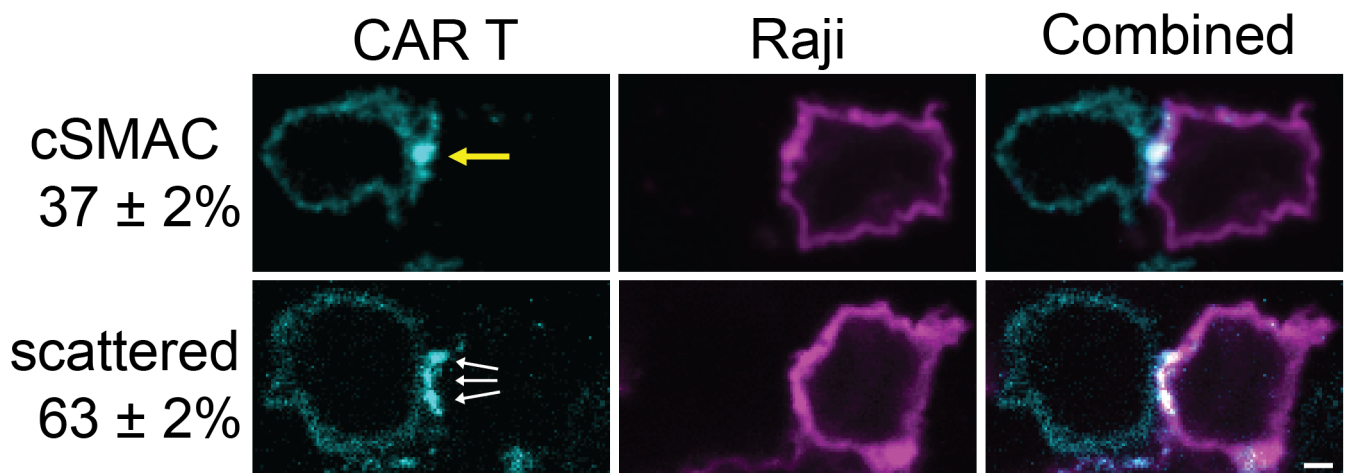

**Figure EV4. Synapses between CAR T cells and Raji B cells.**

CAR-GFP forms a cSMAC-like (yellow arrow) or scattered pattern (white arrows) in the immunological synapse between CAR T cells and Raji B cells. mCherry-CAAX serves as a marker for the plasma membrane of Raji B cells. T cells and B cells were mixed for 20 min before being fixed and imaged by confocal microscopy. Quantification showed the percentage of cells that display a cSMAC or scattered pattern.  $N = 3$  independent experiments. Shown are means  $\pm$  SD. Scale bar: 2  $\mu$ m.

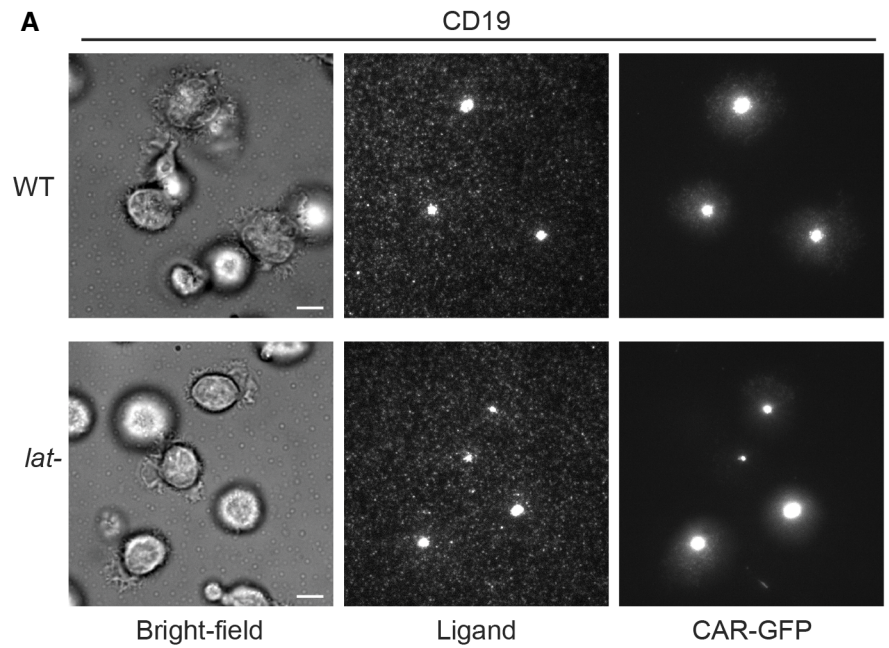

**Figure EV5. 1<sup>st</sup>-generation CAR forms microclusters and immunological synapses in LAT-knockout primary T cells.**

A WT or LAT-knockout (*lat-*) primary T cells expressing the 1<sup>st</sup>-generation CAR were stimulated on SLBs coated with biotin-CD19 and his-ICAM-1. TIRF microscopy revealed clustering of Ax647-labeled streptavidin–biotin-CD19 and CAR. Scale bar, 5  $\mu$ m.

B Quantification of clustering level of Ax647-labeled streptavidin–biotin-CD19. Central band: mean; box: quartiles; whisker: rest of the distribution.  $n = 123$  cells for WT, 106 cells for *lat-*. Clustering is quantified as normalized variance. *n.s.*  $P = 0.67$ . Statistical test: unpaired two-tailed t-test.

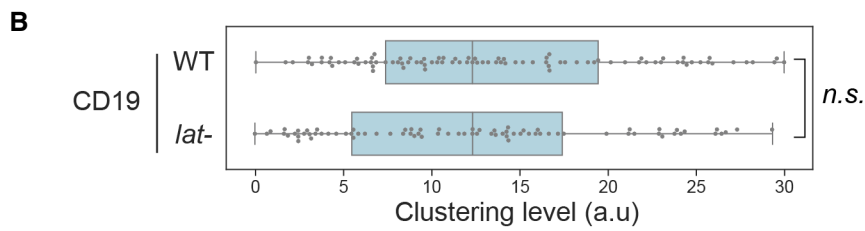

Supplement: EMBJ-39-e104730-s002.pdf [file EMBJ-39-e104730-s002.pdf]
