# Supplementary material
Source: PubMed Central journal article supplement (PMC7429742)
Supplement: EMBJ-39-e104730-s001.pdf [file EMBJ-39-e104730-s001.pdf]

## **Appendix**

### **Table of Contents**

|                         |   |
|-------------------------|---|
| Appendix Figure S1..... | 2 |
|-------------------------|---|

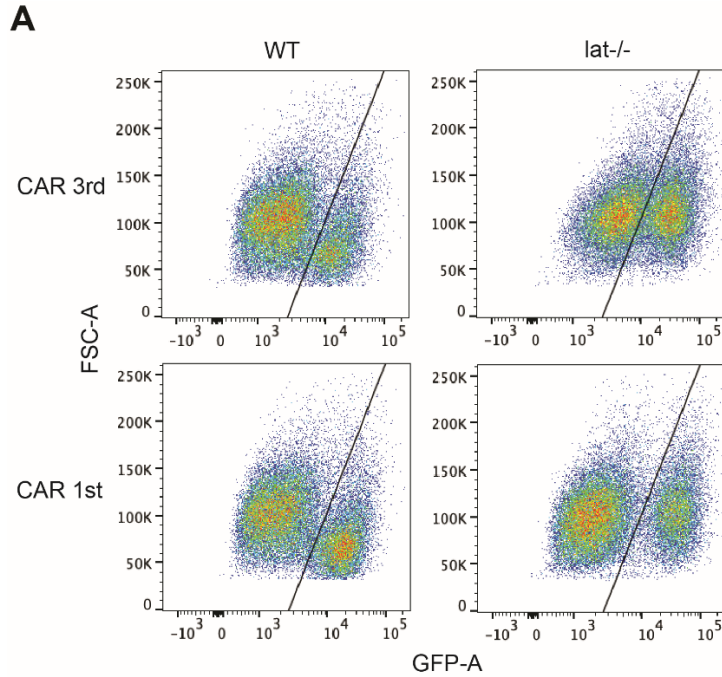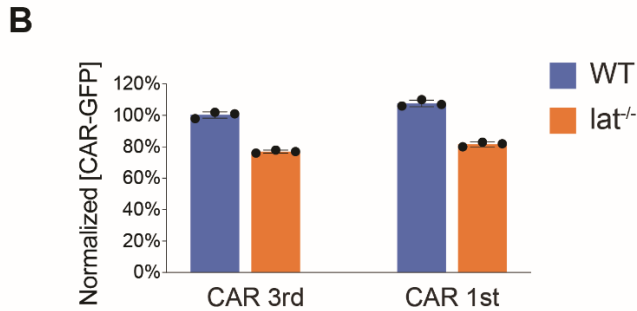

**Appendix Figure S1. CAR expression.**

- A. FACS analysis revealed protein levels of CAR-GFP during the activation assay. Jurkat T cells expressing CAR-GFP were mixed with Raji B cells. The right part of each plot indicates GFP+ population of CAR T cells.
- B. Quantification of normalized CAR expression level, as measured by dividing the total fluorescence intensity of GFP by the forward scatter value (FSC). The averaged expression level of 3<sup>rd</sup> generation CAR in WT cells is set to 100%. Shown are mean  $\pm$  SD. N=3 experiments. 30-33K cells were quantified in each experiment.
